# Supplementary material for: Effect of Pholiota nameko Polysaccharides Inhibiting Methylglyoxal-Induced Glycation Damage In Vitro
Source: MDPI journal article supplement (doi:10.3390/antiox10101589), 2021-10-10
Supplement: s1 [file s1]

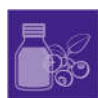

## Supplementary Materials

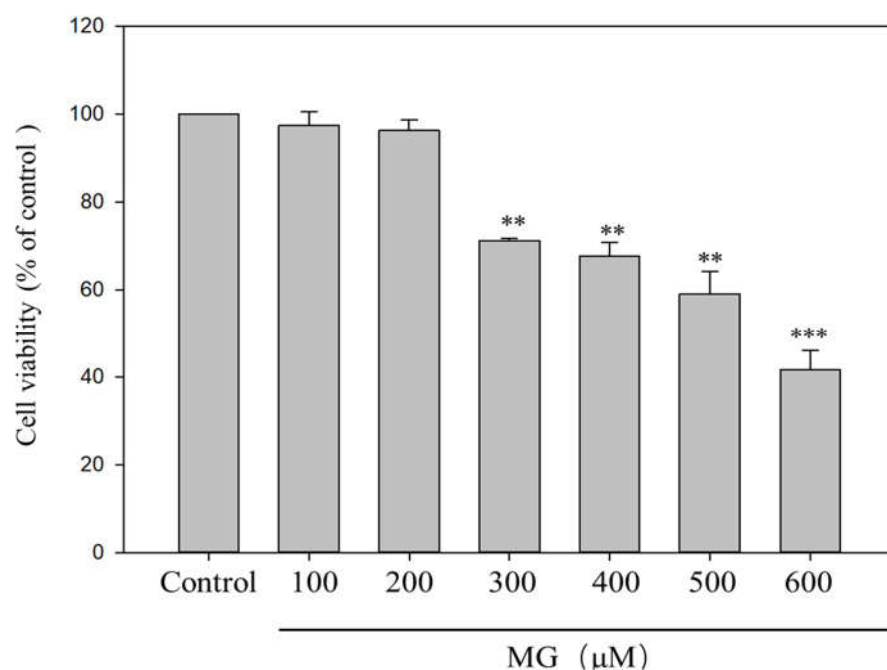

**Figure S1.** Effect of MG on cell viability. Cells were pretreated with MG for (100–600  $\mu\text{M}$ ) for 24 hours, and then their viability was determined using an MTT assay. Experiments were conducted in triplicate ( $n = 3$ ), and the data are expressed as the mean  $\pm$  SD. \* Significant difference with the controls ( $p < 0.05$ ); \*\* significant difference with the controls ( $p < 0.01$ ); \*\*\* significant difference with the controls ( $p < 0.001$ ).
